# Supplementary material for: Band gap engineering of bulk ZrO2 by Ti doping
Source: Royal Society of Chemistry journal article supplement (doi:10.1039/c1cp21987a), 2011-01-01
Supplement: c1cp21987a.pdf [file c1cp21987a.pdf]

## Supporting Information

### Band gap engineering of bulk ZrO<sub>2</sub> by Ti doping

Federico Gallino, Cristiana Di Valentin,<sup>‡</sup> and Gianfranco Pacchioni

*Dipartimento di Scienza dei Materiali, Università di Milano-Bicocca,  
Via R. Cozzi 53, 20125 Milano, Italy*

---

<sup>‡</sup> Corresponding author: [cristiana.divalentin@mater.unimib.it](mailto:cristiana.divalentin@mater.unimib.it)

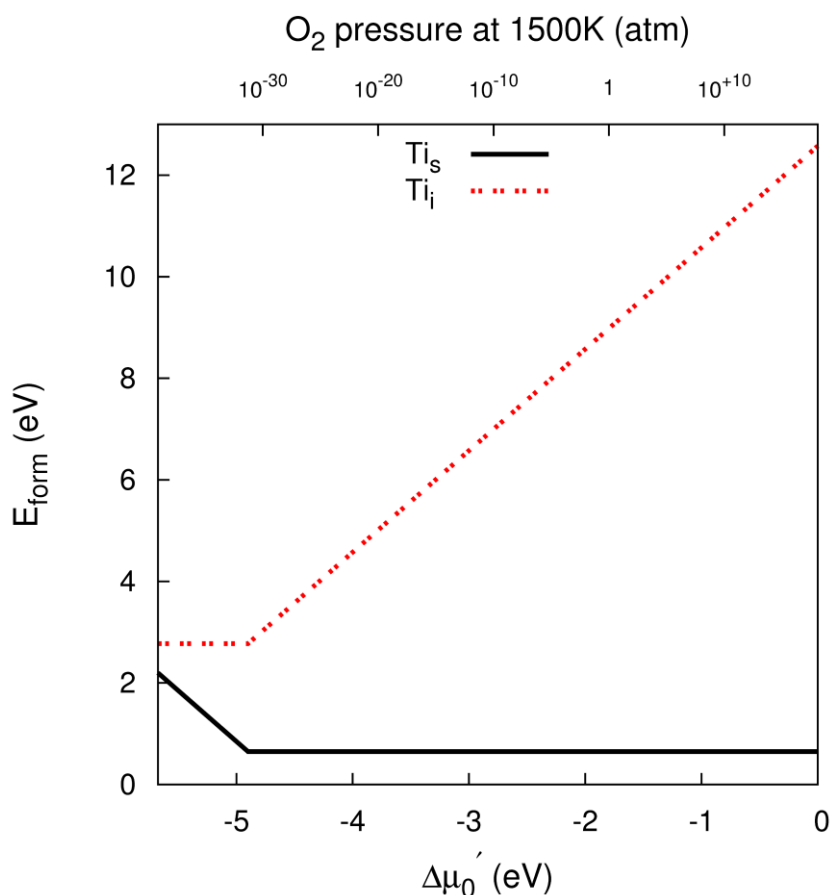

Figure S1. Formation energy  $E_{\text{form}}$  of substitutional to Zr and interstitial Ti atoms,  $\text{Ti}_s$  and  $\text{Ti}_i$  respectively, as a function of delta oxygen chemical potential  $\Delta\mu'_O$  at the zero Fermi level ( $E_F = 0$ ). In the upper x-axis  $\Delta\mu'_O$  is expressed in terms of  $\text{O}_2$  pressure assuming a temperature of 1500 K ( $t$ - $\text{ZrO}_2$  phase thermodynamic stable region). Note that this stability diagram is referred to the diluted case with one Ti atom in the supercell model (<0.03 molar fraction).

Table S1. Cartesian coordinates of all the atoms in the supercell for the two most representative geometrical configurations of  $2\text{Ti}_s$  reported in Fig. 3(a-b) and discussed in the text. All the values are in Å.

| ID Number | Atom | 2Ti <sub>s</sub> Fig. 3a |          |          | 2Ti <sub>s</sub> Fig. 3b |          |          |
|-----------|------|--------------------------|----------|----------|--------------------------|----------|----------|
|           |      | x                        | y        | z        | x                        | y        | z        |
| 1         | Zr   | -0,01853                 | 3,64715  | -0,02300 | -0,00042                 | 3,65384  | -0,00398 |
| 2         | Zr   | 0,03064                  | 3,61846  | 5,27369  | -0,00058                 | -3,65424 | -0,00411 |
| 3         | Zr   | 0,01344                  | -3,64551 | 0,01030  | 5,46211                  | 5,46246  | -2,62966 |
| 4         | Zr   | -0,01548                 | -3,63108 | 5,26142  | 5,46258                  | 5,46216  | 2,58125  |
| 5         | Zr   | -0,01627                 | 0,01486  | -0,00820 | 0,00066                  | 3,63025  | -5,28907 |
| 6         | Zr   | -1,82675                 | -1,80970 | -2,65165 | 0,00053                  | -3,62997 | -5,28887 |
| 7         | Zr   | 3,64857                  | 3,63117  | 0,00521  | -3,63595                 | 0,00027  | -5,27626 |
| 8         | Zr   | 3,63199                  | 3,66492  | 5,30726  | 3,63698                  | 0,00011  | -5,27676 |
| 9         | Zr   | 3,62737                  | -3,62728 | 0,02897  | -0,00061                 | -0,00015 | 0,07348  |
| 10        | Zr   | 3,65405                  | -3,64523 | 5,28839  | 0,00065                  | 0,00027  | -5,25038 |
| 11        | Zr   | 3,67227                  | 0,01645  | 0,00930  | 3,64136                  | 3,60076  | -0,01654 |
| 12        | Zr   | 3,56487                  | -0,01588 | -5,27873 | -3,64218                 | -3,60114 | -0,01626 |

|    |    |          |          |          |          |          |          |
|----|----|----------|----------|----------|----------|----------|----------|
| 13 | Zr | -3,64165 | 3,64373  | 0,00955  | -3,64206 | 3,60025  | -0,01616 |
| 14 | Zr | -3,63638 | 3,61907  | 5,26334  | 3,64098  | -3,60079 | -0,01637 |
| 15 | Zr | -3,63344 | -3,63477 | -0,02999 | 3,64854  | 3,64722  | 5,27211  |
| 16 | Zr | -3,64744 | -3,65257 | 5,32811  | -3,64755 | -3,64666 | 5,27244  |
| 17 | Zr | -3,64440 | -0,00228 | 0,02317  | -3,64775 | 3,64711  | 5,27291  |
| 18 | Zr | -3,60919 | 0,01309  | -5,31206 | 3,64841  | -3,64660 | 5,27236  |
| 19 | Zr | -1,81124 | -1,84249 | 2,63380  | 1,79696  | 1,81744  | 2,64712  |
| 20 | Zr | 1,83770  | 1,80638  | -2,63913 | -1,79599 | -1,81794 | 2,64693  |
| 21 | Zr | 1,83434  | 5,45154  | 2,67895  | -1,79606 | 1,81745  | 2,64698  |
| 22 | Zr | 1,80785  | 5,46644  | -2,65512 | 1,79682  | -1,81766 | 2,64685  |
| 23 | Zr | 1,78969  | -1,79701 | 2,66624  | -1,83628 | -1,82507 | -2,61414 |
| 24 | Zr | 1,83978  | -1,82555 | -2,62347 | 1,83515  | 1,82530  | -2,61416 |
| 25 | Zr | 5,43010  | 1,80737  | 2,66576  | 1,83534  | -1,82496 | -2,61428 |
| 26 | Zr | 5,46543  | 1,82353  | -2,67025 | -1,83631 | 1,82521  | -2,61404 |
| 27 | Zr | 5,46660  | 5,47326  | 2,61144  | 1,83836  | 5,46209  | 2,64939  |
| 28 | Zr | 5,45482  | 5,45655  | -2,61656 | -1,83743 | 5,46217  | 2,64924  |
| 29 | Zr | 5,45663  | -1,79806 | 2,67631  | 5,46196  | -1,85424 | -2,66736 |
| 30 | Zr | 5,46312  | -1,82207 | -2,65605 | 5,46192  | 1,85459  | -2,66811 |
| 31 | Zr | -1,74401 | 1,83715  | 2,63097  | 1,81495  | 5,46232  | -2,67083 |
| 32 | Zr | -1,85126 | 1,80453  | -2,65656 | -1,81568 | 5,46224  | -2,67097 |
| 33 | Zr | -1,83431 | 5,46612  | 2,65147  | 5,46265  | -1,77379 | 2,65123  |
| 34 | Zr | -1,80599 | 5,44845  | -2,67513 | 5,46269  | 1,77326  | 2,65057  |
| 35 | O  | -1,83366 | -0,00629 | -1,03932 | 5,46257  | -3,64603 | 4,22071  |
| 36 | O  | -1,59614 | 0,06974  | 4,30904  | 5,46276  | 3,64636  | 4,22055  |
| 37 | O  | 1,86010  | 3,52950  | 1,65625  | 1,89857  | 3,64340  | 1,58771  |
| 38 | O  | 1,77858  | 3,61684  | -3,68149 | -1,89813 | -3,64390 | 1,58735  |
| 39 | O  | 1,83056  | -3,63328 | 1,61510  | -1,89856 | 3,64353  | 1,58745  |
| 40 | O  | 1,76741  | -3,61900 | -3,70019 | 1,89856  | -3,64373 | 1,58761  |
| 41 | O  | 1,77997  | 0,14605  | 1,73420  | -3,67323 | -1,89079 | -1,63141 |
| 42 | O  | 1,93600  | -0,01428 | -3,60821 | 3,67239  | 1,89097  | -1,63198 |
| 43 | O  | 5,47430  | 3,65009  | 1,60651  | 3,67243  | -1,89109 | -1,63170 |
| 44 | O  | 5,45706  | 3,65949  | -3,69898 | -3,67330 | 1,89143  | -1,63203 |
| 45 | O  | 5,42172  | -3,61749 | 1,60539  | 1,81258  | 3,63265  | -3,69257 |
| 46 | O  | 5,47645  | -3,66498 | -3,68736 | -1,81228 | -3,63254 | -3,69264 |
| 47 | O  | 5,47808  | -0,01599 | 1,60434  | -1,81278 | 3,63260  | -3,69273 |
| 48 | O  | 5,46594  | -0,00097 | -3,70005 | 1,81227  | -3,63271 | -3,69250 |
| 49 | O  | -1,84326 | 3,66825  | 1,58611  | -3,63659 | -1,81576 | 3,66019  |
| 50 | O  | -1,77092 | 3,60410  | -3,71930 | 3,63790  | 1,81548  | 3,66011  |
| 51 | O  | -1,79710 | -3,65132 | 1,57695  | 3,63714  | -1,81545 | 3,66024  |
| 52 | O  | -1,78820 | -3,62745 | -3,70775 | -3,63707 | 1,81534  | 3,65999  |
| 53 | O  | -1,81948 | -0,01295 | 1,62674  | 1,58286  | -0,00005 | 1,70069  |
| 54 | O  | -1,92208 | 0,00308  | -3,67426 | -1,58279 | -0,00022 | 1,70094  |
| 55 | O  | -0,11638 | 1,83581  | 0,96096  | -0,00050 | -1,68057 | -1,56256 |
| 56 | O  | 0,04009  | 1,67478  | -4,38105 | -0,00039 | 1,68096  | -1,56229 |
| 57 | O  | 0,05508  | 5,43994  | 1,05454  | 1,83894  | 0,00046  | -3,63041 |
| 58 | O  | -0,00972 | 5,45419  | -4,26090 | -1,83923 | 0,00022  | -3,63025 |
| 59 | O  | 0,04211  | -1,79584 | 1,03442  | 0,00041  | -1,84558 | 3,72847  |
| 60 | O  | -0,03934 | -1,70933 | -4,30319 | 0,00024  | 1,84569  | 3,72855  |
| 61 | O  | 3,74248  | 1,81804  | 1,02670  | 5,46221  | 3,55978  | 1,56143  |
| 62 | O  | 3,64074  | 1,83393  | -4,27367 | 5,46207  | -3,56020 | 1,56175  |
| 63 | O  | 3,61018  | 5,44834  | 1,06154  | -3,61543 | 5,46251  | -1,60752 |
| 64 | O  | 3,61899  | 5,47233  | -4,22294 | 3,61485  | 5,46225  | -1,60730 |

|     |    |          |          |          |          |          |          |
|-----|----|----------|----------|----------|----------|----------|----------|
| 65  | O  | 3,59103  | -1,78264 | 1,07245  | 5,46257  | 3,65871  | -3,71894 |
| 66  | O  | 3,66521  | -1,84690 | -4,23373 | 5,46238  | -3,65799 | -3,71861 |
| 67  | O  | -3,64537 | 1,82196  | 1,05330  | -3,65441 | 5,46267  | 3,67003  |
| 68  | O  | -3,65668 | 1,83671  | -4,25148 | 3,65516  | 5,46235  | 3,67041  |
| 69  | O  | -3,65658 | 5,48660  | 1,04144  | 5,46263  | -0,00034 | 1,63937  |
| 70  | O  | -3,60187 | 5,43827  | -4,25179 | -0,00038 | 5,46216  | -1,60514 |
| 71  | O  | -3,63654 | -1,83809 | 1,05240  | 5,46240  | -0,00024 | -3,64707 |
| 72  | O  | -3,65400 | -1,82992 | -4,25267 | 0,00037  | 5,46206  | 3,67504  |
| 73  | O  | 0,20457  | 2,01680  | 3,52200  | -0,00030 | 1,90093  | 1,06627  |
| 74  | O  | -0,00696 | 1,80636  | -1,67109 | -0,00011 | -1,90119 | 1,06595  |
| 75  | O  | -0,03099 | 5,49723  | 3,68943  | -2,00221 | 0,00013  | -0,90006 |
| 76  | O  | 0,00024  | 5,46137  | -1,60073 | 2,00121  | -0,00020 | -0,90062 |
| 77  | O  | -0,03293 | -2,05005 | 3,63107  | 0,00126  | 1,81787  | -4,21553 |
| 78  | O  | 0,00281  | -1,80783 | -1,62050 | -0,00006 | -1,81760 | -4,21561 |
| 79  | O  | 3,41738  | 1,74672  | 3,62982  | -1,81713 | 0,00083  | 4,29818  |
| 80  | O  | 3,65444  | 1,82800  | -1,60801 | 1,81802  | -0,00043 | 4,29762  |
| 81  | O  | 3,71220  | 5,49159  | 3,70354  | -0,00015 | 5,46216  | 1,05692  |
| 82  | O  | 3,62682  | 5,46003  | -1,59190 | 5,46193  | -0,00020 | -0,91897 |
| 83  | O  | 3,62343  | -1,77117 | 3,71308  | 0,00037  | 5,46226  | -4,25432 |
| 84  | O  | 3,64890  | -1,82958 | -1,57868 | 5,46284  | 0,00005  | 4,27434  |
| 85  | O  | -3,59560 | 1,74658  | 3,67835  | 3,58484  | 1,65766  | 0,95483  |
| 86  | O  | -3,64979 | 1,82816  | -1,59746 | -3,58510 | -1,65834 | 0,95526  |
| 87  | O  | -3,67306 | 5,39755  | 3,69722  | -3,58514 | 1,65787  | 0,95490  |
| 88  | O  | -3,63012 | 5,47491  | -1,61200 | 3,58476  | -1,65786 | 0,95497  |
| 89  | O  | -3,61092 | -1,68341 | 3,70256  | -1,79806 | -3,61326 | -1,05705 |
| 90  | O  | -3,64540 | -1,83924 | -1,59995 | 1,79733  | 3,61328  | -1,05692 |
| 91  | O  | 1,81857  | 3,63066  | -1,02620 | 1,79721  | -3,61319 | -1,05704 |
| 92  | O  | 1,85398  | 3,86797  | 4,30851  | -1,79796 | 3,61333  | -1,05692 |
| 93  | O  | 1,82063  | -3,64111 | -1,04486 | 3,64466  | 1,82709  | -4,26762 |
| 94  | O  | 1,85123  | -3,67885 | 4,25101  | -3,64410 | -1,82688 | -4,26692 |
| 95  | O  | 1,82801  | 0,01510  | -0,97646 | -3,64505 | 1,82706  | -4,26672 |
| 96  | O  | 1,61483  | -0,19761 | 4,41758  | 3,64512  | -1,82684 | -4,26709 |
| 97  | O  | 5,46689  | 3,66068  | -1,04654 | -1,82212 | -3,65406 | 4,24152  |
| 98  | O  | 5,43083  | 3,50212  | 4,23806  | 1,82298  | 3,65407  | 4,24120  |
| 99  | O  | 5,45143  | -3,65304 | -1,03424 | 1,82287  | -3,65350 | 4,24151  |
| 100 | O  | 5,49293  | -3,57850 | 4,24214  | -1,82247 | 3,65358  | 4,24196  |
| 101 | O  | 5,47043  | -0,00664 | -1,04957 | 3,71218  | 5,46219  | 1,01611  |
| 102 | O  | 5,41722  | 0,07254  | 4,26067  | -3,71287 | 5,46216  | 1,01590  |
| 103 | O  | -1,82773 | 3,65084  | -1,06741 | 5,46190  | -3,68261 | -1,05990 |
| 104 | O  | -1,80329 | 3,59159  | 4,22645  | 5,46194  | 3,68256  | -1,06019 |
| 105 | O  | -1,80536 | -3,63822 | -1,05459 | 3,62512  | 5,46243  | -4,26070 |
| 106 | O  | -1,89253 | -3,67332 | 4,23662  | -3,62494 | 5,46260  | -4,26038 |
| 107 | Ti | 1,82182  | 1,86011  | 2,58629  | 3,70257  | -0,00011 | -0,01204 |
| 108 | Ti | -0,00145 | -0,03929 | 5,35387  | -3,70411 | -0,00061 | -0,01156 |

Table S2. Cartesian coordinates of all the atoms in the supercell for the two most representative geometrical configurations of 4Ti<sub>s</sub>, reported in Fig. 3(c-d) and discussed in the text. All the values are in Å.

| ID Number | Atom | 4Ti <sub>s</sub> Fig. 3c |          |          | 4Ti <sub>s</sub> Fig. 3d |          |          |
|-----------|------|--------------------------|----------|----------|--------------------------|----------|----------|
|           |      | x                        | y        | z        | x                        | y        | z        |
| 1         | Zr   | 0,00000                  | 3,62498  | -0,06538 | 0,00291                  | -3,64449 | -0,02245 |
| 2         | Zr   | 0,00000                  | -3,62498 | -0,06538 | -3,64733                 | 0,00707  | 0,00020  |
| 3         | Zr   | -3,62498                 | 0,00000  | 0,06538  | 3,61928                  | 0,01440  | -0,01366 |
| 4         | Zr   | 3,62498                  | 0,00000  | 0,06538  | -0,03294                 | 3,64270  | 5,28156  |
| 5         | Zr   | 0,00000                  | 3,62460  | 5,22788  | 0,01076                  | -3,64983 | -5,27870 |
| 6         | Zr   | 0,00000                  | -3,62460 | 5,22788  | -3,63205                 | 0,01149  | 5,27842  |
| 7         | Zr   | -3,62460                 | 0,00000  | -5,22788 | 3,64235                  | 0,00486  | -5,27453 |
| 8         | Zr   | 3,62460                  | 0,00000  | -5,22788 | 0,01140                  | 0,01186  | -0,01974 |
| 9         | Zr   | 3,63611                  | 3,63611  | 0,00000  | 0,01374                  | 0,00139  | -5,27830 |
| 10        | Zr   | -3,63611                 | -3,63611 | 0,00000  | -3,64812                 | -3,62847 | 0,00807  |
| 11        | Zr   | -3,63611                 | 3,63611  | 0,00000  | -3,68052                 | 3,64414  | 0,01187  |
| 12        | Zr   | 3,63611                  | -3,63611 | 0,00000  | 3,62578                  | -3,64706 | -0,01665 |
| 13        | Zr   | 3,63634                  | 3,63634  | 5,29318  | 3,68996                  | 3,64226  | 5,28355  |
| 14        | Zr   | -3,63634                 | -3,63634 | 5,29318  | -3,63239                 | -3,65167 | -5,30669 |
| 15        | Zr   | -3,63634                 | 3,63634  | 5,29318  | -3,63225                 | 3,63679  | -5,23624 |
| 16        | Zr   | 3,63634                  | -3,63634 | 5,29318  | 3,64793                  | -3,65212 | -5,27695 |
| 17        | Zr   | 1,82610                  | 1,82605  | 2,64640  | 1,83115                  | 1,85114  | 2,67604  |
| 18        | Zr   | -1,82610                 | -1,82605 | 2,64640  | -1,78384                 | -1,81474 | 2,65821  |
| 19        | Zr   | -1,82605                 | -1,82610 | -2,64640 | -1,84434                 | -1,82147 | -2,67946 |
| 20        | Zr   | 1,82605                  | 1,82610  | -2,64640 | -1,84000                 | 1,83591  | 2,61807  |
| 21        | Zr   | -1,82610                 | 1,82605  | 2,64640  | 1,82879                  | -1,81765 | 2,61836  |
| 22        | Zr   | 1,82610                  | -1,82605 | 2,64640  | -1,75949                 | 1,82417  | -2,62119 |
| 23        | Zr   | -1,82605                 | 1,82610  | -2,64640 | 1,81845                  | -1,83126 | -2,56804 |
| 24        | Zr   | 1,82605                  | -1,82610 | -2,64640 | 1,83150                  | 5,44325  | 2,67904  |
| 25        | Zr   | 1,83765                  | 5,46229  | 2,58161  | -1,84125                 | -5,46796 | 2,61809  |
| 26        | Zr   | -1,83765                 | 5,46229  | 2,58161  | -5,45059                 | -1,82075 | -2,68532 |
| 27        | Zr   | 5,46229                  | -1,83765 | -2,58161 | 5,36855                  | 1,83152  | -2,60702 |
| 28        | Zr   | 5,46229                  | 1,83765  | -2,58161 | -1,76544                 | 5,45333  | -2,62805 |
| 29        | Zr   | 1,83720                  | 5,46229  | -2,71231 | 5,43918                  | -1,81454 | 2,66068  |
| 30        | Zr   | -1,83720                 | 5,46229  | -2,71231 | -5,42694                 | 1,82998  | 2,62736  |
| 31        | Zr   | 5,46229                  | -1,83720 | 2,71231  | -5,42562                 | 5,46054  | 2,62266  |
| 32        | Zr   | 5,46229                  | 1,83720  | 2,71231  | 5,37635                  | 5,44901  | -2,61674 |
| 33        | O    | 1,75131                  | 3,59284  | 1,54081  | 1,85854                  | 3,64859  | 1,69794  |
| 34        | O    | -1,75131                 | -3,59284 | 1,54081  | -1,76888                 | -3,63641 | 1,58710  |
| 35        | O    | -3,59284                 | -1,75131 | -1,54081 | -3,65033                 | -1,81910 | -1,58812 |
| 36        | O    | 3,59284                  | 1,75131  | -1,54081 | 3,38674                  | 1,64710  | -1,73650 |
| 37        | O    | -1,75131                 | 3,59284  | 1,54081  | -1,99113                 | 3,64498  | 1,61387  |
| 38        | O    | 1,75131                  | -3,59284 | 1,54081  | 1,82716                  | -3,70051 | 1,60701  |
| 39        | O    | -3,59284                 | 1,75131  | -1,54081 | -3,64864                 | 2,04762  | -1,59889 |
| 40        | O    | 3,59284                  | -1,75131 | -1,54081 | 3,75869                  | -1,83378 | -1,58260 |
| 41        | O    | 1,75031                  | 3,59225  | -3,75234 | 1,80919                  | 3,65260  | -3,50294 |
| 42        | O    | -1,75031                 | -3,59225 | -3,75234 | -1,80961                 | -3,63617 | -3,69666 |
| 43        | O    | -3,59225                 | -1,75031 | 3,75234  | -3,63466                 | -1,81727 | 3,66901  |
| 44        | O    | 3,59225                  | 1,75031  | 3,75234  | 3,66394                  | 1,83417  | 3,65154  |
| 45        | O    | -1,75031                 | 3,59225  | -3,75234 | -1,81830                 | 3,63435  | -3,66899 |

|    |   |          |          |          |          |          |          |
|----|---|----------|----------|----------|----------|----------|----------|
| 46 | O | 1,75031  | -3,59225 | -3,75234 | 1,82097  | -3,76667 | -3,61743 |
| 47 | O | -3,59225 | 1,75031  | 3,75234  | -3,63293 | 1,78238  | 3,70334  |
| 48 | O | 3,59225  | -1,75031 | 3,75234  | 3,62566  | -1,81652 | 3,70668  |
| 49 | O | 1,99380  | 0,00000  | 1,69121  | 1,82521  | 0,06648  | 1,60682  |
| 50 | O | -1,99380 | 0,00000  | 1,69121  | -1,76147 | 0,00597  | 1,58792  |
| 51 | O | 0,00000  | -1,99380 | -1,69121 | -0,12251 | -1,83306 | -1,58341 |
| 52 | O | 0,00000  | 1,99380  | -1,69121 | 0,22837  | 1,61787  | -1,75059 |
| 53 | O | 1,99507  | 0,00000  | -3,60171 | 1,82334  | 0,10217  | -3,62298 |
| 54 | O | -1,99507 | 0,00000  | -3,60171 | -1,79607 | -0,00479 | -3,69667 |
| 55 | O | 0,00000  | -1,99507 | 3,60171  | 0,02935  | -1,81877 | 3,70512  |
| 56 | O | 0,00000  | 1,99507  | 3,60171  | -0,00782 | 1,83921  | 3,64280  |
| 57 | O | 5,46229  | 3,81088  | 1,71246  | -5,24776 | 3,64400  | 1,63597  |
| 58 | O | 5,46229  | -3,81088 | 1,71246  | 5,41471  | -3,63531 | 1,59100  |
| 59 | O | -3,81088 | 5,46229  | -1,71246 | -3,64897 | 5,19993  | -1,60876 |
| 60 | O | 3,81088  | 5,46229  | -1,71246 | 3,40409  | 5,62346  | -1,73557 |
| 61 | O | 5,46229  | 3,81307  | -3,58092 | 5,46399  | 3,63384  | -3,66017 |
| 62 | O | 5,46229  | -3,81307 | -3,58092 | -5,47490 | -3,64051 | -3,69196 |
| 63 | O | -3,81307 | 5,46229  | 3,58092  | -3,63437 | -5,41851 | 3,70005  |
| 64 | O | 3,81307  | 5,46229  | 3,58092  | 3,66612  | 5,45490  | 3,64909  |
| 65 | O | 5,46229  | 0,00000  | 1,66143  | -5,51566 | 0,00526  | 1,59228  |
| 66 | O | 0,00000  | 5,46229  | -1,66143 | 0,20860  | -5,27596 | -1,73946 |
| 67 | O | 5,46229  | 0,00000  | -3,63147 | 5,43450  | 0,00150  | -3,69121 |
| 68 | O | 0,00000  | 5,46229  | 3,63147  | -0,00864 | -5,47296 | 3,64499  |
| 69 | O | 0,00000  | 1,65083  | 0,93400  | -0,01892 | 1,95639  | 0,92995  |
| 70 | O | 0,00000  | -1,65083 | 0,93400  | 0,02592  | -1,81858 | 1,06186  |
| 71 | O | -1,65083 | 0,00000  | -0,93400 | -1,85010 | 0,12064  | -1,05945 |
| 72 | O | 1,65083  | 0,00000  | -0,93400 | 1,81824  | -0,34659 | -0,93446 |
| 73 | O | 0,00000  | 1,65013  | -4,35901 | -0,01530 | 1,84212  | -4,29122 |
| 74 | O | 0,00000  | -1,65013 | -4,35901 | 0,08467  | -1,82550 | -4,21775 |
| 75 | O | -1,65013 | 0,00000  | 4,35901  | -1,80155 | -0,01876 | 4,24912  |
| 76 | O | 1,65013  | 0,00000  | 4,35901  | 1,82703  | 0,02280  | 4,27067  |
| 77 | O | 0,00000  | 5,46229  | 0,98518  | -0,02948 | 5,33780  | 0,93767  |
| 78 | O | 5,46229  | 0,00000  | -0,98518 | 5,47578  | 0,13164  | -1,05381 |
| 79 | O | 0,00000  | 5,46229  | -4,30823 | -0,04776 | 5,44082  | -4,29116 |
| 80 | O | 5,46229  | 0,00000  | 4,30823  | -5,46637 | -0,01597 | 4,25240  |
| 81 | O | 3,71126  | 1,86949  | 1,10571  | 3,66605  | 1,95735  | 0,93243  |
| 82 | O | -3,71126 | -1,86949 | 1,10571  | -3,64266 | -1,81171 | 1,04140  |
| 83 | O | -1,86949 | -3,71126 | -1,10571 | -1,86078 | -3,77091 | -1,05986 |
| 84 | O | 1,86949  | 3,71126  | -1,10571 | 1,78462  | 3,66047  | -0,79954 |
| 85 | O | -3,71126 | 1,86949  | 1,10571  | -3,64006 | 1,76560  | 1,04585  |
| 86 | O | 3,71126  | -1,86949 | 1,10571  | 3,61643  | -1,81814 | 1,06363  |
| 87 | O | -1,86949 | 3,71126  | -1,10571 | -1,50255 | 3,63086  | -1,00662 |
| 88 | O | 1,86949  | -3,71126 | -1,10571 | 1,81743  | -3,33192 | -0,94416 |
| 89 | O | 3,71167  | 1,86991  | -4,18734 | 3,66600  | 1,84570  | -4,28331 |
| 90 | O | -3,71167 | -1,86991 | -4,18734 | -3,64191 | -1,81677 | -4,25900 |
| 91 | O | -1,86991 | -3,71167 | 4,18734  | -1,80299 | -3,61993 | 4,24792  |
| 92 | O | 1,86991  | 3,71167  | 4,18734  | 1,82782  | 3,64687  | 4,33277  |
| 93 | O | -3,71167 | 1,86991  | -4,18734 | -3,62859 | 1,80380  | -4,22481 |
| 94 | O | 3,71167  | -1,86991 | -4,18734 | 3,56486  | -1,82572 | -4,21800 |
| 95 | O | -1,86991 | 3,71167  | 4,18734  | -1,84095 | 3,64276  | 4,24921  |
| 96 | O | 1,86991  | -3,71167 | 4,18734  | 1,82855  | -3,66365 | 4,27414  |
| 97 | O | 3,46938  | 5,46229  | 0,95576  | 3,67746  | -5,59081 | 0,93272  |

|     |    |          |          |          |          |          |          |
|-----|----|----------|----------|----------|----------|----------|----------|
| 98  | O  | -3,46938 | 5,46229  | 0,95576  | -3,64105 | -5,40152 | 1,03924  |
| 99  | O  | 5,46229  | -3,46938 | -0,95576 | 5,48591  | -3,78444 | -1,05475 |
| 100 | O  | 5,46229  | 3,46938  | -0,95576 | 5,13537  | 3,62853  | -0,98180 |
| 101 | O  | 3,46594  | 5,46229  | -4,33839 | 3,70341  | -5,48615 | -4,29054 |
| 102 | O  | -3,46594 | 5,46229  | -4,33839 | -3,63073 | 5,47262  | -4,22873 |
| 103 | O  | 5,46229  | -3,46594 | 4,33839  | 5,45930  | -3,61947 | 4,25031  |
| 104 | O  | 5,46229  | 3,46594  | 4,33839  | -5,42992 | 3,64043  | 4,25681  |
| 105 | Ti | 0,00000  | 0,00000  | 0,00000  | 0,08230  | 3,65205  | 0,04831  |
| 106 | Ti | 0,00000  | 0,00000  | 5,29318  | 3,47207  | 3,64808  | 0,04790  |
| 107 | Ti | 5,46229  | 5,46229  | 2,64485  | 1,80421  | 1,81735  | -2,75619 |
| 108 | Ti | 5,46229  | 5,46229  | -2,64485 | 1,80133  | 5,45711  | -2,72078 |

Table S3. Cartesian coordinates of all the atoms in the supercell for the most representative geometrical configurations of 5Ti<sub>s</sub> and 6Ti<sub>s</sub> discussed in the text. All the values are in Å.

| ID Number | Atom | 5Ti <sub>s</sub> |          |          | 6Ti <sub>s</sub> |          |          |          |
|-----------|------|------------------|----------|----------|------------------|----------|----------|----------|
|           |      | x                | y        | z        | Atom             | x        | y        | z        |
| 1         | Zr   | 0,00000          | 3,65164  | 5,24016  | Zr               | 0,00000  | 3,62215  | 5,25924  |
| 2         | Zr   | 0,00000          | -3,65164 | 5,24016  | Zr               | 0,00000  | -3,62215 | 5,25924  |
| 3         | Zr   | -3,59720         | 0,00000  | -5,30783 | Zr               | -3,62215 | 0,00000  | -5,25924 |
| 4         | Zr   | 3,59720          | 0,00000  | -5,30783 | Zr               | 3,62215  | 0,00000  | -5,25924 |
| 5         | Zr   | 0,00000          | 0,00000  | -0,03345 | Zr               | 0,00000  | 0,00000  | 0,00000  |
| 6         | Zr   | 0,00000          | 0,00000  | 5,33660  | Zr               | 0,00000  | 0,00000  | 5,29318  |
| 7         | Zr   | 3,58717          | 3,60616  | 0,00078  | Zr               | 3,59210  | 3,59210  | 0,00000  |
| 8         | Zr   | -3,58717         | -3,60616 | 0,00078  | Zr               | -3,59210 | -3,59210 | 0,00000  |
| 9         | Zr   | -3,58717         | 3,60616  | 0,00078  | Zr               | -3,59210 | 3,59210  | 0,00000  |
| 10        | Zr   | 3,58717          | -3,60616 | 0,00078  | Zr               | 3,59210  | -3,59210 | 0,00000  |
| 11        | Zr   | 3,68115          | 3,63822  | 5,32025  | Zr               | 3,65310  | 3,65310  | 5,29318  |
| 12        | Zr   | -3,68115         | -3,63822 | 5,32025  | Zr               | -3,65310 | -3,65310 | 5,29318  |
| 13        | Zr   | -3,68115         | 3,63822  | 5,32025  | Zr               | -3,65310 | 3,65310  | 5,29318  |
| 14        | Zr   | 3,68115          | -3,63822 | 5,32025  | Zr               | 3,65310  | -3,65310 | 5,29318  |
| 15        | Zr   | 1,79255          | 1,82231  | 2,59014  | Zr               | 1,80314  | 1,83121  | 2,60593  |
| 16        | Zr   | -1,79255         | -1,82231 | 2,59014  | Zr               | -1,80314 | -1,83121 | 2,60593  |
| 17        | Zr   | -1,83011         | -1,81122 | -2,62358 | Zr               | -1,83121 | -1,80314 | -2,60593 |
| 18        | Zr   | 1,83011          | 1,81122  | -2,62358 | Zr               | 1,83121  | 1,80314  | -2,60593 |
| 19        | Zr   | -1,79255         | 1,82231  | 2,59014  | Zr               | -1,80314 | 1,83121  | 2,60593  |
| 20        | Zr   | 1,79255          | -1,82231 | 2,59014  | Zr               | 1,80314  | -1,83121 | 2,60593  |
| 21        | Zr   | -1,83011         | 1,81122  | -2,62358 | Zr               | -1,83121 | 1,80314  | -2,60593 |
| 22        | Zr   | 1,83011          | -1,81122 | -2,62358 | Zr               | 1,83121  | -1,80314 | -2,60593 |
| 23        | Zr   | 1,96958          | 5,46229  | 2,70435  | Zr               | 1,94371  | 5,46229  | 2,67834  |
| 24        | Zr   | -1,96958         | 5,46229  | 2,70435  | Zr               | -1,94371 | 5,46229  | 2,67834  |
| 25        | Zr   | 5,46229          | -1,85597 | -2,65914 | Zr               | 5,46229  | -1,94371 | -2,67834 |
| 26        | Zr   | 5,46229          | 1,85597  | -2,65914 | Zr               | 5,46229  | 1,94371  | -2,67834 |
| 27        | Zr   | 1,77310          | 5,46229  | -2,69172 | Zr               | 1,78882  | 5,46229  | -2,73692 |
| 28        | Zr   | -1,77310         | 5,46229  | -2,69172 | Zr               | -1,78882 | 5,46229  | -2,73692 |
| 29        | Zr   | 5,46229          | -1,78168 | 2,71539  | Zr               | 5,46229  | -1,78882 | 2,73692  |
| 30        | Zr   | 5,46229          | 1,78168  | 2,71539  | Zr               | 5,46229  | 1,78882  | 2,73692  |

|    |    |          |          |          |   |          |          |          |
|----|----|----------|----------|----------|---|----------|----------|----------|
| 31 | Zr | 5,46229  | 5,46229  | -2,51474 | O | 2,04138  | 3,67181  | 1,63195  |
| 32 | O  | 2,03706  | 3,67092  | 1,64050  | O | -2,04138 | -3,67181 | 1,63195  |
| 33 | O  | -2,03706 | -3,67092 | 1,64050  | O | -3,67181 | -2,04138 | -1,63195 |
| 34 | O  | -3,66693 | -2,03653 | -1,64040 | O | 3,67181  | 2,04138  | -1,63195 |
| 35 | O  | 3,66693  | 2,03653  | -1,64040 | O | -2,04138 | 3,67181  | 1,63195  |
| 36 | O  | -2,03706 | 3,67092  | 1,64050  | O | 2,04138  | -3,67181 | 1,63195  |
| 37 | O  | 2,03706  | -3,67092 | 1,64050  | O | -3,67181 | 2,04138  | -1,63195 |
| 38 | O  | -3,66693 | 2,03653  | -1,64040 | O | 3,67181  | -2,04138 | -1,63195 |
| 39 | O  | 3,66693  | -2,03653 | -1,64040 | O | 1,75400  | 3,58781  | -3,66708 |
| 40 | O  | 1,80020  | 3,62983  | -3,66439 | O | -1,75400 | -3,58781 | -3,66708 |
| 41 | O  | -1,80020 | -3,62983 | -3,66439 | O | -3,58781 | -1,75400 | 3,66708  |
| 42 | O  | -3,57588 | -1,74167 | 3,64443  | O | 3,58781  | 1,75400  | 3,66708  |
| 43 | O  | 3,57588  | 1,74167  | 3,64443  | O | -1,75400 | 3,58781  | -3,66708 |
| 44 | O  | -1,80020 | 3,62983  | -3,66439 | O | 1,75400  | -3,58781 | -3,66708 |
| 45 | O  | 1,80020  | -3,62983 | -3,66439 | O | -3,58781 | 1,75400  | 3,66708  |
| 46 | O  | -3,57588 | 1,74167  | 3,64443  | O | 3,58781  | -1,75400 | 3,66708  |
| 47 | O  | 3,57588  | -1,74167 | 3,64443  | O | 1,45775  | 0,00000  | 1,65341  |
| 48 | O  | 1,46194  | 0,00000  | 1,63030  | O | -1,45775 | 0,00000  | 1,65341  |
| 49 | O  | -1,46194 | 0,00000  | 1,63030  | O | 0,00000  | -1,45775 | -1,65341 |
| 50 | O  | 0,00000  | -1,45021 | -1,67092 | O | 0,00000  | 1,45775  | -1,65341 |
| 51 | O  | 0,00000  | 1,45021  | -1,67092 | O | 1,91233  | 0,00000  | -3,65870 |
| 52 | O  | 1,84434  | 0,00000  | -3,67350 | O | -1,91233 | 0,00000  | -3,65870 |
| 53 | O  | -1,84434 | 0,00000  | -3,67350 | O | 0,00000  | -1,91233 | 3,65870  |
| 54 | O  | 0,00000  | -1,96774 | 3,65016  | O | 0,00000  | 1,91233  | 3,65870  |
| 55 | O  | 0,00000  | 1,96774  | 3,65016  | O | 5,46229  | 3,61177  | 1,66824  |
| 56 | O  | 5,46229  | 3,61302  | 1,66414  | O | 5,46229  | -3,61177 | 1,66824  |
| 57 | O  | 5,46229  | -3,61302 | 1,66414  | O | -3,61177 | 5,46229  | -1,66824 |
| 58 | O  | -3,52320 | 5,46229  | -1,56877 | O | 3,61177  | 5,46229  | -1,66824 |
| 59 | O  | 3,52320  | 5,46229  | -1,56877 | O | 5,46229  | 3,92050  | -3,56522 |
| 60 | O  | 5,46229  | 3,67662  | -3,64552 | O | 5,46229  | -3,92050 | -3,56522 |
| 61 | O  | 5,46229  | -3,67662 | -3,64552 | O | -3,92050 | 5,46229  | 3,56522  |
| 62 | O  | -3,93550 | 5,46229  | 3,61485  | O | 3,92050  | 5,46229  | 3,56522  |
| 63 | O  | 3,93550  | 5,46229  | 3,61485  | O | 5,46229  | 0,00000  | 1,68562  |
| 64 | O  | 5,46229  | 0,00000  | 1,64597  | O | 0,00000  | 5,46229  | -1,68562 |
| 65 | O  | 0,00000  | 5,46229  | -1,65337 | O | 5,46229  | 0,00000  | -3,55663 |
| 66 | O  | 5,46229  | 0,00000  | -3,62053 | O | 0,00000  | 5,46229  | 3,55663  |
| 67 | O  | 0,00000  | 5,46229  | 3,57051  | O | 0,00000  | 2,11426  | 0,91738  |
| 68 | O  | 0,00000  | 2,09790  | 0,92416  | O | 0,00000  | -2,11426 | 0,91738  |
| 69 | O  | 0,00000  | -2,09790 | 0,92416  | O | -2,11426 | 0,00000  | -0,91738 |
| 70 | O  | -2,11418 | 0,00000  | -0,93692 | O | 2,11426  | 0,00000  | -0,91738 |
| 71 | O  | 2,11418  | 0,00000  | -0,93692 | O | 0,00000  | 1,78996  | -4,27058 |
| 72 | O  | 0,00000  | 1,83373  | -4,27667 | O | 0,00000  | -1,78996 | -4,27058 |
| 73 | O  | 0,00000  | -1,83373 | -4,27667 | O | -1,78996 | 0,00000  | 4,27058  |
| 74 | O  | -1,75406 | 0,00000  | 4,24624  | O | 1,78996  | 0,00000  | 4,27058  |
| 75 | O  | 1,75406  | 0,00000  | 4,24624  | O | 0,00000  | 5,46229  | 0,89464  |
| 76 | O  | 0,00000  | 5,46229  | 0,90649  | O | 5,46229  | 0,00000  | -0,89464 |
| 77 | O  | 5,46229  | 0,00000  | -0,94139 | O | 0,00000  | 5,46229  | -4,32594 |
| 78 | O  | 0,00000  | 5,46229  | -4,30306 | O | 5,46229  | 0,00000  | 4,32594  |
| 79 | O  | 5,46229  | 0,00000  | 4,29282  | O | 3,58955  | 1,65010  | 0,97813  |



|     |    |          |          |          |    |          |          |          |
|-----|----|----------|----------|----------|----|----------|----------|----------|
| 80  | O  | 3,58609  | 1,64887  | 0,96232  | O  | -3,58955 | -1,65010 | 0,97813  |
| 81  | O  | -3,58609 | -1,64887 | 0,96232  | O  | -1,65010 | -3,58955 | -0,97813 |
| 82  | O  | -1,63187 | -3,56006 | -0,96696 | O  | 1,65010  | 3,58955  | -0,97813 |
| 83  | O  | 1,63187  | 3,56006  | -0,96696 | O  | -3,58955 | 1,65010  | 0,97813  |
| 84  | O  | -3,58609 | 1,64887  | 0,96232  | O  | 3,58955  | -1,65010 | 0,97813  |
| 85  | O  | 3,58609  | -1,64887 | 0,96232  | O  | -1,65010 | 3,58955  | -0,97813 |
| 86  | O  | -1,63187 | 3,56006  | -0,96696 | O  | 1,65010  | -3,58955 | -0,97813 |
| 87  | O  | 1,63187  | -3,56006 | -0,96696 | O  | 3,70198  | 1,85653  | -4,23426 |
| 88  | O  | 3,63003  | 1,81427  | -4,25195 | O  | -3,70198 | -1,85653 | -4,23426 |
| 89  | O  | -3,63003 | -1,81427 | -4,25195 | O  | -1,85653 | -3,70198 | 4,23426  |
| 90  | O  | -1,88093 | -3,75472 | 4,26925  | O  | 1,85653  | 3,70198  | 4,23426  |
| 91  | O  | 1,88093  | 3,75472  | 4,26925  | O  | -3,70198 | 1,85653  | -4,23426 |
| 92  | O  | -3,63003 | 1,81427  | -4,25195 | O  | 3,70198  | -1,85653 | -4,23426 |
| 93  | O  | 3,63003  | -1,81427 | -4,25195 | O  | -1,85653 | 3,70198  | 4,23426  |
| 94  | O  | -1,88093 | 3,75472  | 4,26925  | O  | 1,85653  | -3,70198 | 4,23426  |
| 95  | O  | 1,88093  | -3,75472 | 4,26925  | O  | 3,78586  | 5,46229  | 0,96170  |
| 96  | O  | 3,78758  | 5,46229  | 1,01562  | O  | -3,78586 | 5,46229  | 0,96170  |
| 97  | O  | -3,78758 | 5,46229  | 1,01562  | O  | 5,46229  | -3,78586 | -0,96170 |
| 98  | O  | 5,46229  | -3,77693 | -0,96579 | O  | 5,46229  | 3,78586  | -0,96170 |
| 99  | O  | 5,46229  | 3,77693  | -0,96579 | O  | 3,34739  | 5,46229  | -4,39934 |
| 100 | O  | 3,63343  | 5,46229  | -4,25096 | O  | -3,34739 | 5,46229  | -4,39934 |
| 101 | O  | -3,63343 | 5,46229  | -4,25096 | O  | 5,46229  | -3,34739 | 4,39934  |
| 102 | O  | 5,46229  | -3,30891 | 4,37120  | O  | 5,46229  | 3,34739  | 4,39934  |
| 103 | O  | 5,46229  | 3,30891  | 4,37120  | Ti | 0,00000  | 3,75273  | -0,04451 |
| 104 | Ti | 0,00000  | 3,74534  | -0,01558 | Ti | 0,00000  | -3,75273 | -0,04451 |
| 105 | Ti | 0,00000  | -3,74534 | -0,01558 | Ti | -3,75273 | 0,00000  | 0,04451  |
| 106 | Ti | -3,74194 | 0,00000  | 0,03125  | Ti | 3,75273  | 0,00000  | 0,04451  |
| 107 | Ti | 3,74194  | 0,00000  | 0,03125  | Ti | 5,46229  | 5,46229  | 2,35674  |
| 108 | Ti | 5,46229  | 5,46229  | 2,36949  | Ti | 5,46229  | 5,46229  | -2,35674 |
